# Supplementary material for: The relationship between duration of access to intravenous oxycodone self-administration, economic demand for oxycodone, and cognition in rats
Source: Research Square preprint supplement (doi:10.21203/rs.3.rs-9349824/v1), 2026-04-23
Supplement: Supplementary file 1 [file 1f79e1aaed9571fee9e690ae.docx]

Supplemental Information


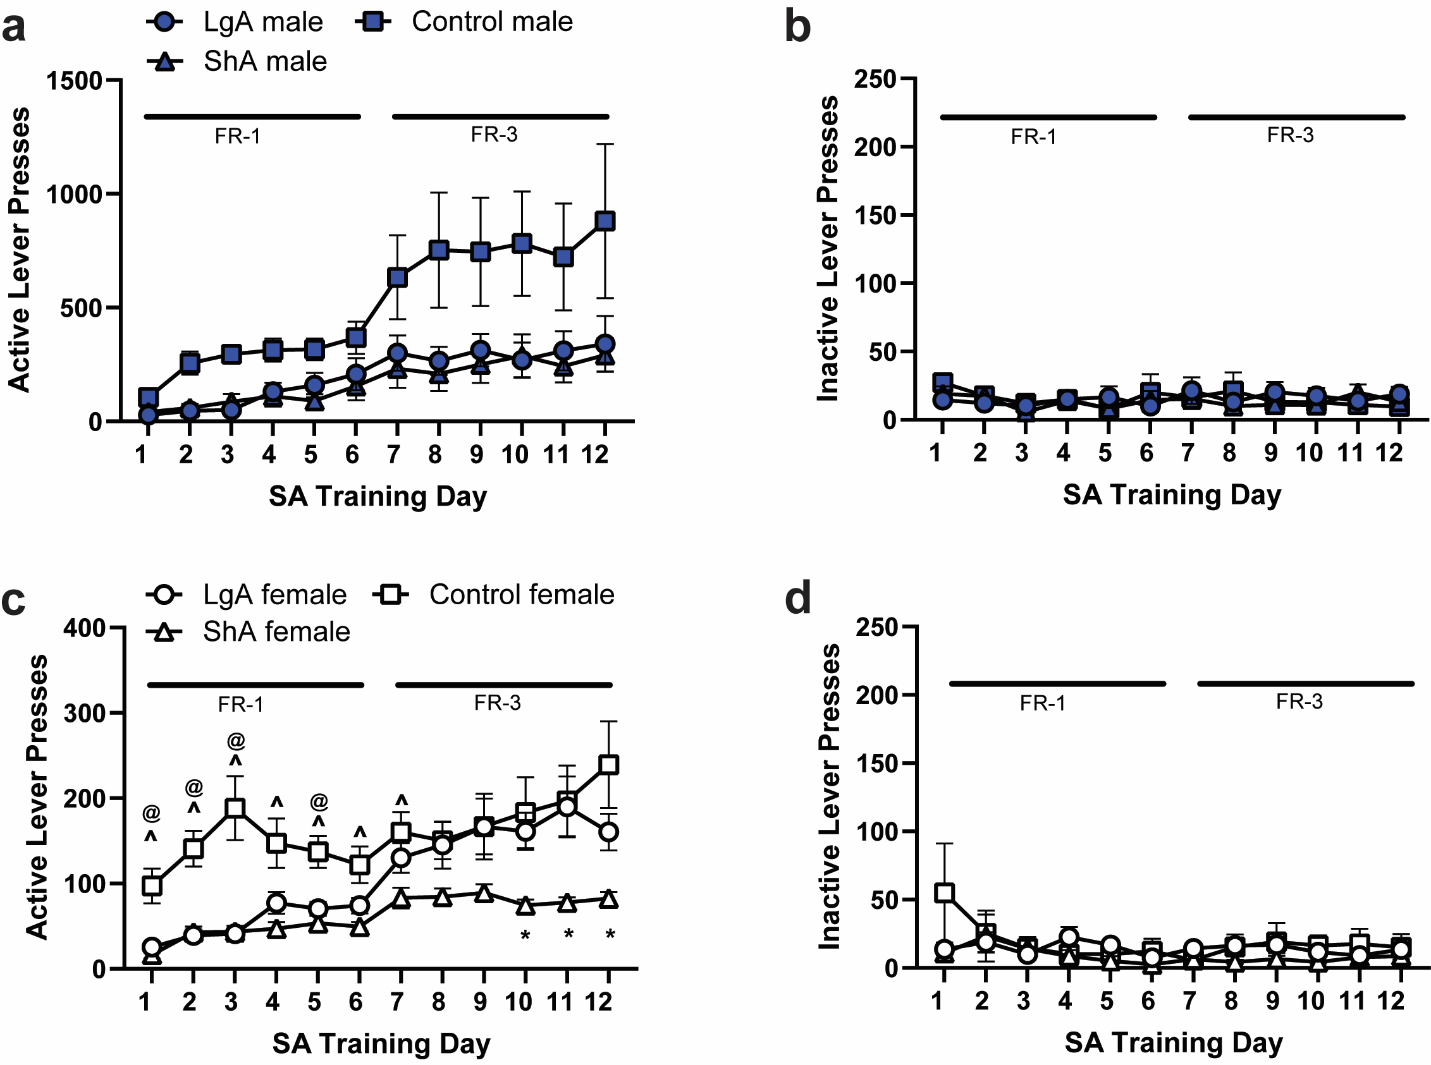


Supplemental Figure 1. Comparison of active and inactive lever presses between oxycodone and food self-administering groups within each sex. a. In males, there was a main effect of Group [F(2, 20) = 4.528, p=0.0239] and Time [F(1.359, 27.18) = 14.58, p=0.0002], with Control rats showing increased active lever presses relative to both oxycodone groups. b. There were no group differences in inactive lever presses in males. c. In females, there was a significant Group x Time interaction [F(6.077, 60.77) = 2.896, p=0.047] for active lever presses. d. There were no main effects of Group or Time for inactive lever presses for females. * = p<0.05 Female LgA vs. Female ShA. ^ = p<0.05 Female Control vs. Female ShA; @ = p<0.05 Female Control vs. Female LgA.


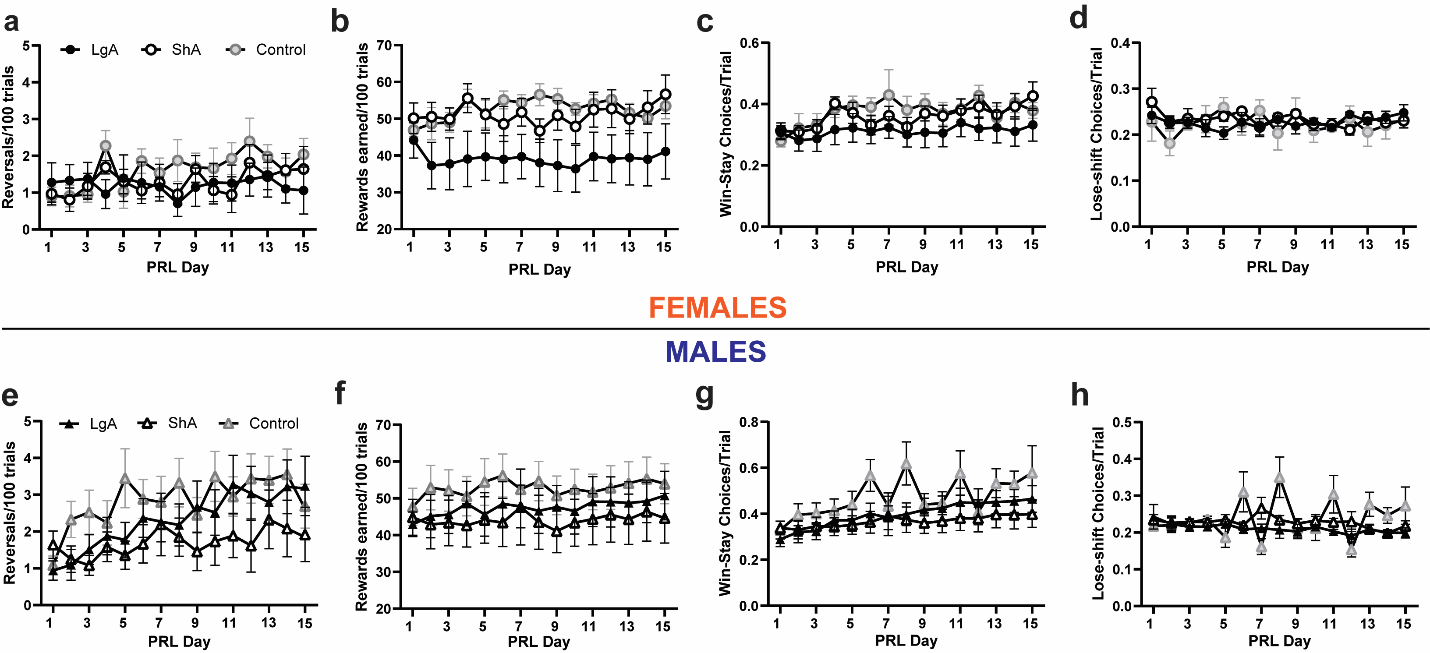


Supplemental Figure 2. Probabilistic Reversal Learning data expressed per trial completed. There were no effects of Group or Time for reversals/100 trials (a) or rewards/100 trials in females (b). There was a main effect of Day for the number of win-stay choices/trial [F(6.319, 126.4) = 3.340, p=0.0037] in females (c). There were no differences in the number of lose-shift choices per trial in females (d). e. In males, the number of reversals/100 trials differed by Day [F(4.529, 90.57) = 5.667, p=0.0002]. f. There were no effects of Group or Day on the number of rewards/100 trials. g. Win-stay choices per trial differed by Day [F(4.526, 90.52) = 6.418, p<0.001] but not Group. h. There was a significant Group x Day interaction for the number of lose-shift choices per trial [F(9.587, 57.52) = 2.703, p=0.0095]. Post-hoc tests found no significant differences between groups on any day.


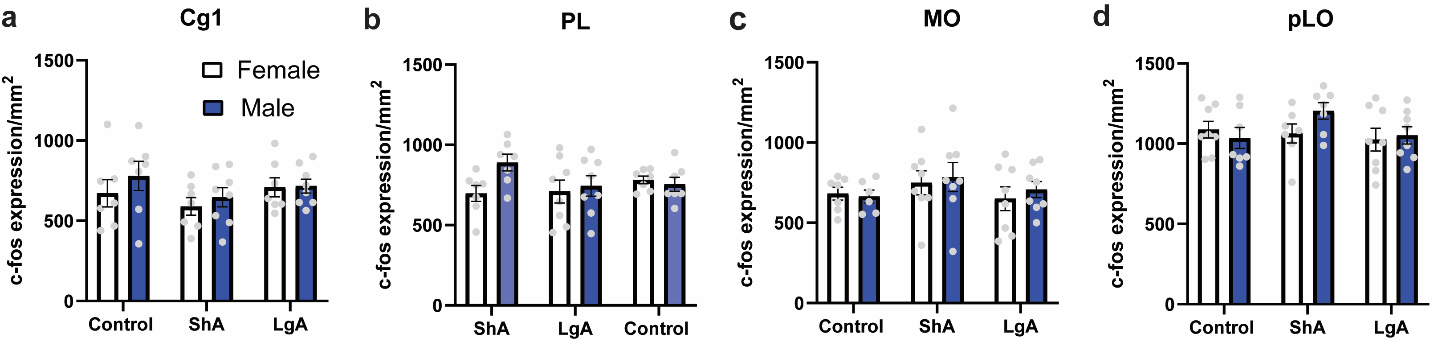


Supplemental Figure 3. C-fos expression following the PRL task did not differ by group in several brain regions. C-fos expression in the (a) anterior cingulate cortex (b) prelimbic cortex (c) medial orbitofrontal cortex and (d) posterior lateral orbitofrontal cortex did not differ by group.
